# Supplementary material for: Efficacy of a Multi-Component m-Health Diet, Physical Activity, and Sleep Intervention on Dietary Intake in Adults with Overweight and Obesity: A Randomised Controlled Trial
Source: MDPI journal article supplement (doi:10.3390/nu13072468), 2021-07-19
Supplement: s1 [file s1]

## Supplementary Material

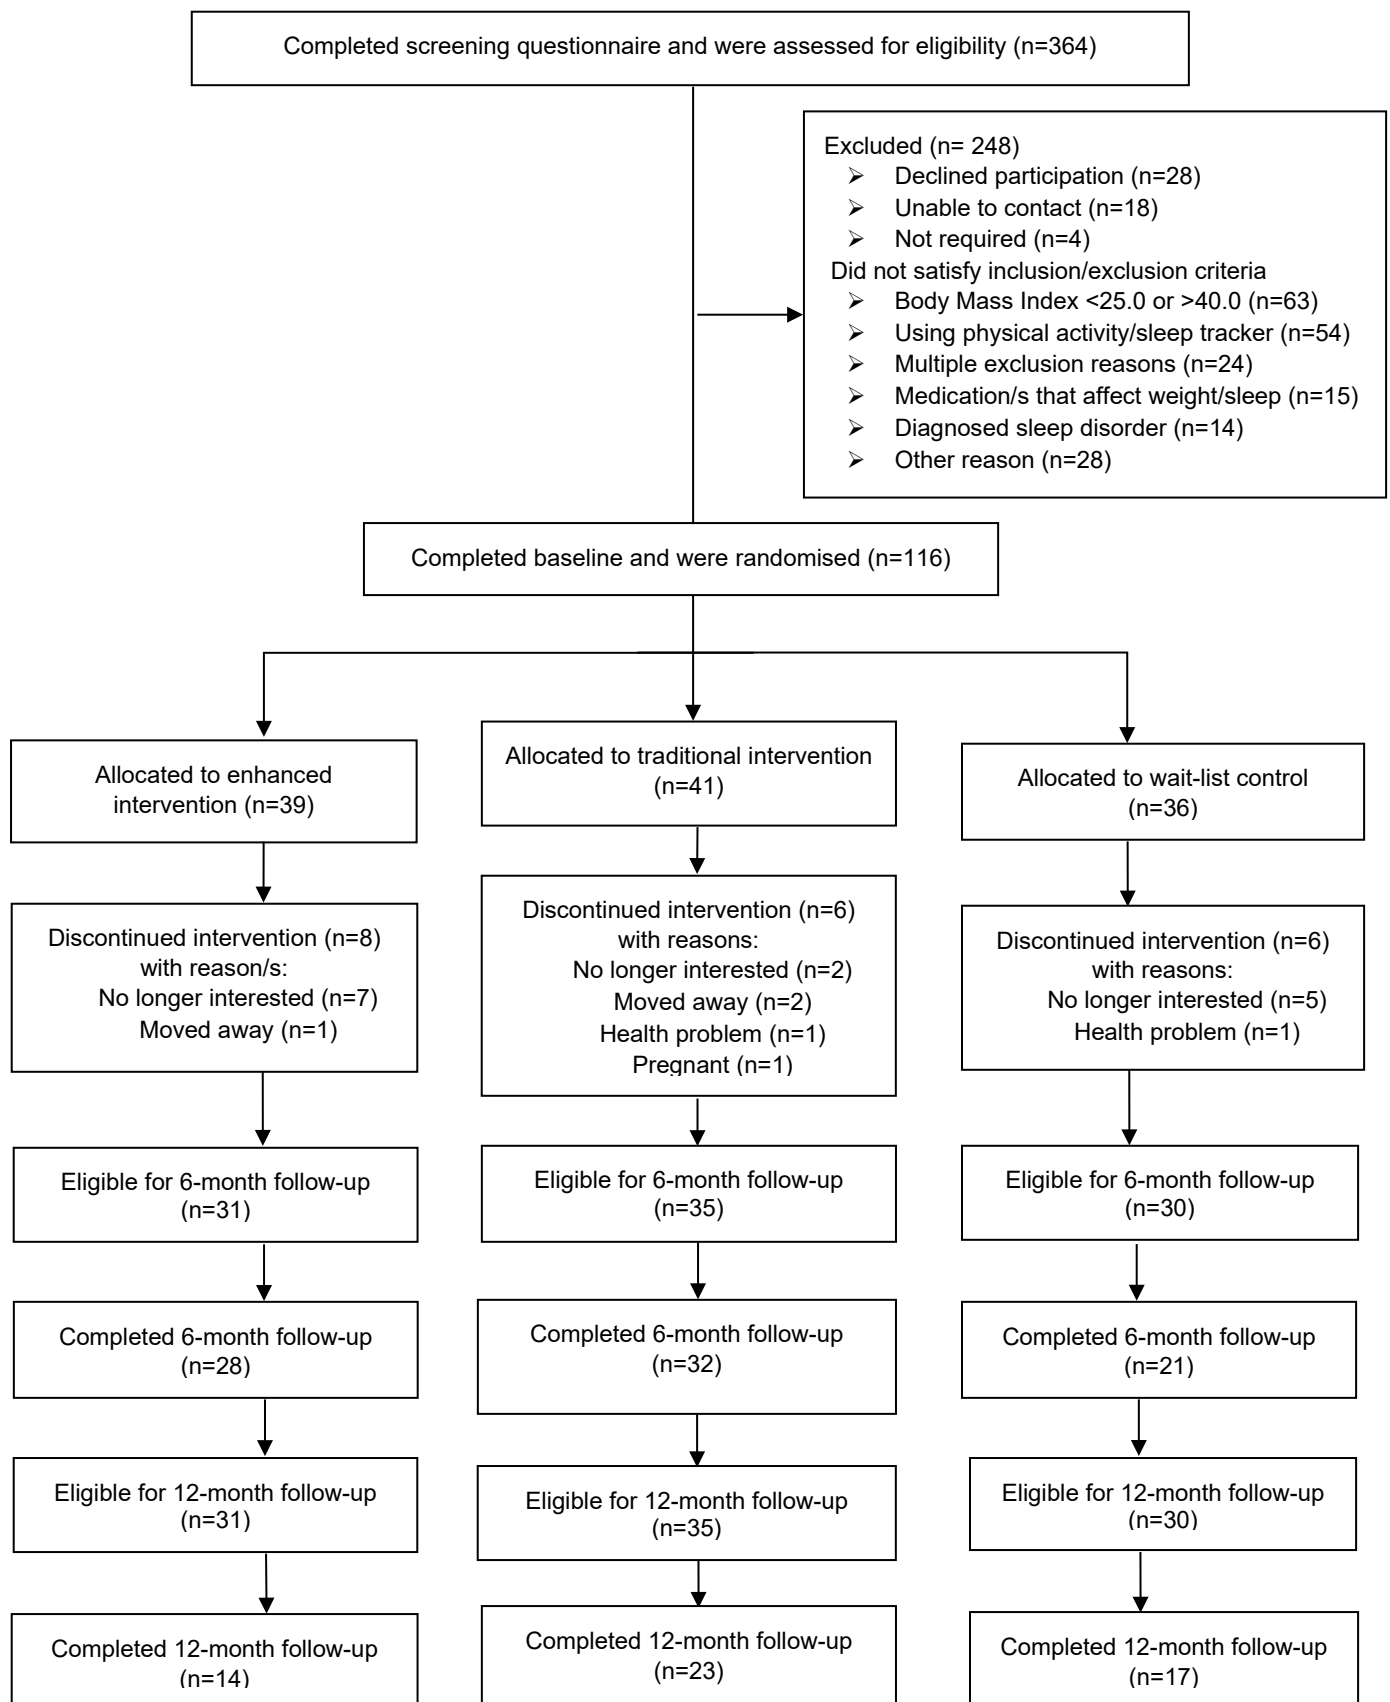

**Figure S1.** CONSORT diagram describing study design and flow of participants
